# Supplementary material for: Zcchc11 Uridylates Mature miRNAs to Enhance Neonatal IGF-1 Expression, Growth, and Survival
Source: PubMed Central journal article supplement (PMC3510031; doi:10.1371/journal.pgen.1003105), 2012-11-29
Supplement: pgen.1003105.s003.pdf [file pgen.1003105.s003.pdf]

Supplementary Table 1: Overview of sequences successfully trimmed of sequencing adaptors and aligned to miRBase for each library. All percentages represent the percent of all sequences for that library.

|                 | Library 1 |            | Library 2  |            | Library 3  |            | Total      |            |
|-----------------|-----------|------------|------------|------------|------------|------------|------------|------------|
|                 | WT        | KO         | WT         | KO         | WT         | KO         | WT         | KO         |
| Total Sequences | 6,982,747 | 20,582,541 | 20,811,654 | 10,164,600 | 13,779,581 | 13,323,920 | 41,573,982 | 44,071,061 |
| Number Trimmed  | 6,656,219 | 19,732,400 | 18,754,122 | 8,917,325  | 12,891,049 | 12,652,294 | 38,301,390 | 41,302,019 |
| Percent Trimmed | 95.3%     | 95.9%      | 90.1%      | 87.7%      | 93.6%      | 95.0%      | 92.1%      | 93.7%      |
| Average Length  | 21.9      | 22.0       | 22.7       | 22.6       | 22.1       | 22.0       | 22.2       | 22.2       |
| Number Aligned* | 5,256,878 | 17,034,524 | 15,436,133 | 7,186,297  | 11,929,405 | 10,685,924 | 32,622,416 | 34,906,745 |
| Percent Aligned | 75.3%     | 82.8%      | 74.2%      | 70.7%      | 86.6%      | 80.2%      | 78.7%      | 77.9%      |

\* Aligned to miRBase v16.
