# Supplementary material for: Zcchc11 Uridylates Mature miRNAs to Enhance Neonatal IGF-1 Expression, Growth, and Survival
Source: PubMed Central journal article supplement (PMC3510031; doi:10.1371/journal.pgen.1003105), 2012-11-29
Supplement: pgen.1003105.s004.pdf [file pgen.1003105.s004.pdf]

**Supplementary Table 2: Oligo sequences.**

| Name                        | Sequence (5' - 3')                                           | Notes                                                                |
|-----------------------------|--------------------------------------------------------------|----------------------------------------------------------------------|
| <b>Genotyping</b>           |                                                              |                                                                      |
| Zcchc11 - F                 | TCTGCCACTTTTGTACCTCTTTCTG                                    | Zcchc11 <sup>+/+</sup> genotyping forward                            |
| Zcchc11 - R                 | CTACAGCCTCAATAAATGATATCCTTTAATAAG                            | Zcchc11 <sup>+/+</sup> genotyping reverse                            |
| β-gal - F                   | CAAATGGCGATTACCGTTGA                                         | Zcchc11 <sup>-/-</sup> genotyping forward                            |
| β-gal - R                   | TGCCCAGTCATAGCCGAATA                                         | Zcchc11 <sup>-/-</sup> genotyping reverse                            |
| <b>miRNA Mimetics (RNA)</b> |                                                              |                                                                      |
| Control                     | siControl #4                                                 | Non-targeting siRNA                                                  |
| Let-7d                      | AGAGGUAGUAGGUUGCAUAGUU                                       | Let-7d mimetic                                                       |
| miR-126                     | CAUUUUUUACUUUUGGUACGCG                                       | miR-126 mimetic                                                      |
| miR-126U                    | CAUUUUUUACUUUUGGUACGCGU                                      | Uridylated miR-126 mimetic                                           |
| miR-126UU                   | CAUUUUUUACUUUUGGUACGCGUU                                     | Double Urid. miR-126 mimetic                                         |
| miR-126mut                  | CACGCGUACUUUUGGUACGCG                                        | Mutated miR-126 mimetic                                              |
| miR-194-2*                  | CCAGUGGGGCGUGCUGUUUUCUG                                      | miR-194-2* mimetic                                                   |
| miR-194-2*UU                | CCAGUGGGGCGUGCUGUUUUCUGUU                                    | Uridylated miR-194-2* mimetic                                        |
| miR-379                     | UGGUAGACUAUGGAACGUAGG                                        | miR-379 mimetic                                                      |
| miR-379U                    | UGGUAGACUAUGGAACGUAGGU                                       | Uridylated miR-379 mimetic                                           |
| miR-379UU                   | UGGUAGACUAUGGAACGUAGGUU                                      | Double urid. miR-379 mimetic                                         |
| miR-379UUUU                 | UGGUAGACUAUGGAACGUAGGUUUU                                    | Quadruple Urid. miR-379 mimetic                                      |
| <b>Northern Blotting</b>    |                                                              |                                                                      |
| cLet-7a                     | AACTATACAACCTACTACCTCA                                       | Complement of Let-7a                                                 |
| cU6                         | GCCATGCTAATCTTCTCTGTATC                                      | Complement of U6 snRNA                                               |
| <b>rtPCR</b>                |                                                              |                                                                      |
| Zcchc6-F                    | CGTTACACTCTTATGGTGCTATACTT                                   | Zcchc6 qRT-PCR forward primer                                        |
| Zcchc6-R                    | CTGGTTTCTTTTACCTTTGATATCT                                    | Zcchc6 qRT-PCR reverse primer                                        |
| Zcchc6 Probe                | AGGTCTCCACCTGTCATC                                           | Zcchc6 qRT-PCR probe                                                 |
| Igf-1 - F                   | TTCTACCTGGCGCTCTGCTT                                         | Igf-1 qRT-PCR forward primer                                         |
| Igf-1 - R                   | CTCGGTCCACACACGAAC                                           | Igf-1 qRT-PCR reverse primer                                         |
| Igf-1 Probe                 | AGCATCCACCAGCTCAG                                            | Igf-1 qRT-PCR probe                                                  |
| 18S - F                     | ATTCGAACGTCTGCCCTATCA                                        | Control qRT-PCR forward primer                                       |
| 18S - R                     | GTCACCCGTGGTCACCATG                                          | Control qRT-PCR reverse primer                                       |
| 18S - probe                 | TCGATGGTAGTCGCCGTGCC                                         | Control qRT-PCR probe                                                |
| <b>Cloning Primers</b>      |                                                              |                                                                      |
| Zcchc11-N - F               | CTACAGCGTCAGATTGGAAGAGTC                                     | Zcchc11 N terminal forward                                           |
| Zcchc11-N - R               | CCC CGCGCCGCTTACTTGTTCATCGTCGTCCTTGTAATCCCAATGCAAATACACTGGCT | Zcchc11 N reverse + NotI site                                        |
| Igf-1 F                     | GGGGAGCTCTAGAGGAAGTGCAGGAAACAAGACC                           | Igf-1 3' UTR forward + SacI site                                     |
| Igf-1 R                     | CCCACGCGTACCAGTTAATCAAACATGATTAATTTAATG                      | Igf-1 3' UTR reverse + Mlu site                                      |
| <b>Deep Sequencing</b>      |                                                              |                                                                      |
| 3' Barcode 1 <sup>†</sup>   | rApp/AAGTATCGTATGCCGTCTTCTGCTTG/ddC                          | 3' Sequencing Adaptor Seq. 1                                         |
| 3' Barcode 2 <sup>†</sup>   | rApp/ATCCTTCGTATGCCGTCTTCTGCTTG/ddC                          | 3' Sequencing Adaptor Seq. 2                                         |
| 3' Barcode 3 <sup>†</sup>   | rApp/AGAGGTCGTATGCCGTCTTCTGCTTG/ddC                          | 3' Sequencing Adaptor Seq. 3                                         |
| 3' Barcode 4 <sup>†</sup>   | rApp/TAGGTTTCGTATGCCGTCTTCTGCTTG/ddC                         | 3' Sequencing Adaptor Seq. 4                                         |
| 5' Adapter*                 | GUUCAGAGUUUCUACAGUCCGACGAUC                                  | 5' Sequencing Adaptor                                                |
| rtPrimer*                   | CAAGCAGAAGACGGCATAACGA                                       | Deep sequencing rtPCR primer                                         |
| Seq. Reverse*               | CAAGCAGAAGACGGCATAACGA                                       | Deep sequencing reverse primer                                       |
| Seq. Forward*               | ATGATACGGCGACCACCGACAGGTTTCAGAGTTCTACAGTCCGA                 | Deep sequencing forward primer<br>(Includes extension for flow cell) |
